# Supplementary material for: Assessment of BOLD and GenBank – Their accuracy and reliability for the identification of biological materials
Source: PubMed Central journal article supplement (PMC6584008; doi:10.1371/journal.pone.0217084), 2019-06-19
Supplement: pone.0217084.s002.pdf [file pone.0217084.s002.pdf]

**S1 Table. Primers and thermal cycling conditions used to amplify each barcoding region for insects, macro-fungi, and plants.**

| Group       | Barcode Region             | Primers                                                                        | Cycling conditions                                                                                                                                        |
|-------------|----------------------------|--------------------------------------------------------------------------------|-----------------------------------------------------------------------------------------------------------------------------------------------------------|
| Insects     | <i>COI</i>                 | LCO1490-L/HCO2198-L (1)                                                        | 1X 95°C for 2 min<br>40X 94°C for 30 sec, 52°C for 30 sec, 72°C for 2 min<br>1X 72°C for 5 min                                                            |
|             |                            | LCO1490/HCO2198 (2)                                                            | 1X 95°C for 2 min<br>43X 94°C for 30 sec, 56°C for 30 sec, 72°C for 1 min<br>1X 72°C for 5 min                                                            |
|             |                            | LepF1/LepR1 (3)                                                                | 1X 95°C for 2 min<br>5X 94°C for 40 sec, 45°C for 40 sec, 72°C for 70 sec<br>35X 94°C for 40 sec, 51°C for 40 sec, 72°C for 70 sec<br>1X 72°C for 5 min   |
|             |                            | LepF1/MLepR1 (4) -35 cycles<br>MLepF1/LepR1 (4) -38 cycles                     | 1X 95°C for 2 min<br>5X 94°C for 30 sec, 45°C for 40 sec, 72°C for 1 min<br>35-38X 94°C for 30 sec, 51°C for 40 sec, 72°C for 1 min<br>1X 72°C for 5 min  |
| Macro-fungi | <i>ITS1</i><br><i>ITS2</i> | ITS5/ITS2 (5)<br>ITS3/ITS4 (5)                                                 | 1X 94°C for 3 min<br>25-40X 94°C for 30 sec, 55°C for 30 sec, 72°C for 45 sec<br>1X 72°C for 10 min                                                       |
| Plants      | <i>rbcL</i>                | rbcLaF (6) /rbcLaR (7) -40 cycles<br>rbcLaF (6) /rbcLajf634R (8) -35 cycles    | 1X 95°C for 4 min<br>35-40X 94°C for 30 sec, 55°C for 30 sec, 72°C for 1 min<br>1X 72°C for 10 min                                                        |
|             |                            | rbcLa-1/rbcLa-B (9)                                                            | 1X 95°C for 3 min<br>10X 95°C for 30 sec, 48°C for 30 sec, 72°C for 30 sec<br>25X 88°C for 30 sec, 52°C for 30 sec, 72°C for 30 sec<br>1X 60°C for 10 min |
|             | <i>matK</i>                | matK-KIM1R-F/matK-KIM3F-R (10,11)<br>matK-xf (12) /matKMALPR1 (13)             | 1X 94°C for 1 min<br>35X 94°C for 30 sec, 57°C for 20 sec, 72°C for 10 sec<br>1X 72°C for 5 min                                                           |
|             |                            | matK390F/matK1326R (14)                                                        | 1X 98°C for 2 min<br>35X 98°C for 10 sec, 54°C for 30 sec, 72°C for 40 sec<br>1X 72°C for 10 min                                                          |
|             |                            | Gym_F1A/Gym_R1A (15)                                                           | 1X 94°C for 3 min<br>35X 94°C for 30 sec, 52°C for 30 sec, 72°C for 45 sec<br>1X 72°C for 10 min                                                          |
|             |                            | moss404F/moss1336R (16)<br>polypodF1/polypodR1 (17)<br>polypodF2/polypodR1(17) | 1X 98°C for 2 min<br>35X 98°C for 10 sec, 50°C for 30 sec, 72°C for 40 sec<br>1X 72°C for 10 min                                                          |
|             | <i>trnH-psbA</i>           | psbAF (18) /trnH2 (19)<br>psbA/trnH (20)                                       | 1X 98°C for 45 sec<br>35X 98°C for 10 sec, 64°C for 30 sec, 72°C for 40 sec<br>1X 72°C for 10 min                                                         |
|             | <i>ITS2</i>                | ITS2F (21) /ITS4 (5)                                                           | 1X 94°C for 5 min<br>35X 94°C for 30 sec, 56°C for 30 sec, 72°C for 45 sec<br>1X 72°C for 10 min                                                          |

## References

- 1 Huemer P, Mutanen M, Sefc KM, & Hebert PD. Testing DNA barcode performance in 1000 species of European Lepidoptera: large geographic distances have small genetic impacts. *PLoS One*. 2014;9: e115774.
- 2 Folmer O, Black M, Hoeh W, Lutz R, & Vrijenhoek R. DNA primers for amplification of mitochondrial cytochrome c oxidase subunit I from diverse metazoan invertebrates. *Mol. Marine Biol. Biotechnol.* 1994;3: 294-299.
- 3 Hebert PD, Penton EH, Burns JM, Janzen DH, & Hallwachs W. Ten species in one: DNA barcoding reveals cryptic species in the neotropical skipper butterfly *Astraptes fulgerator*. *PNAS*. 2004;101: 14812-14817
- 4 Hajibabaei M, Janzen DH, Burns JM, Hallwachs W, & Hebert PD. DNA barcodes distinguish species of tropical Lepidoptera. *PNAS*. 2006;103: 968-971.
- 5 White TJ, Bruns T, Lee S, & Taylor J. Amplification and direct sequencing of fungal ribosomal RNA genes for phylogenetics. In: Innis MA, Gelfand DH, Sninsky JJ, White TJ., editors. *PCR Protocols: A Guide to Methods and Applications*. Cambridge: Academic Press; 1990. pp 315-322.
- 6 Levin RA, Wagner WL, Hoch PC, Nepokroeff M, Pires JC, Zimmer EA, et al. Family-Level Relationships of Onagraceae Based on Chloroplast *rbcL* and *ndhF* Data. *Am. J. Bot.*, 2003;90:107-115.
- 7 Kress WJ, Erickson DL, Jones FA, Swenson NG, Perez R, Sanjur O, et al. Plant DNA barcodes and a community phylogeny of a tropical forest dynamics plot in Panama. *PNAS*. 2009;106: 18621-18626.
- 8 Fazekas AJ, Burgess KS, Kesanakurti PR, Graham SW, Newmaster SG, Husband BC, et al. Multiple multilocus DNA barcodes from the plastid genome discriminate plant species equally well. *PLoS One*. 2008;3: e2802.
- 9 Little DP. A DNA mini-barcode for land plants. *Mol. Ecol. Res.* 2014;14: 437-446.
- 10 Fazekas AJ, Kuzmina ML, Newmaster SG, & Hollingsworth, PM. *Methods in Molecular Biology*. In: Erickson D, Kress W, editors. *DNA Barcodes Methods and Protocols*. New York: Humana Press; 2012. pp. 223-252.
- 11 Costion C, Ford A, Cross H, Crayn D, Harrington M, Lowe A. Plant DNA barcodes can accurately estimate species richness in poorly known floras. *PLoS One*. 2011;6: e26841.
- 12 Ford CS, Ayres KL, Toomey N, Haider N, Stahl JVA, Kelly LJ, et al. Selection of candidate coding DNA barcoding regions for use on land plants. *Bot. J. Linn. Soc.* 2009;159: 1-11.
- 13 Dunning LT, & Savolainen V. Broad-scale amplification of *matK* for DNA barcoding plants, a technical note. *Bot. J. Linn. Soc.* 2010;164: 1-9.
- 14 Cuénoud P, Savolainen V, Chatrou LW, Powell M, Grayer RJ, Chase MW. Molecular phylogenetics of Caryophyllales based on nuclear 18S rDNA and plastid *rbcL*, *atpB*, and *matK* DNA sequences. *Am. J. Bot.* 2002;89: 132-144.
- 15 Li Y, Gao LM, Poudel RC, Li DZ, & Forrest A. High universality of *matK* primers for barcoding gymnosperms. *J. Syst. Evol.* 2011;49: 169-175.
- 16 Forrest A. *DNA Barcoding of Plants: matK primers for mosses*. (Royal Botanic Garden Edinburgh, Edinburgh, U.K., 2012).
- 17 Forrest, A. *DNA Barcoding of Plants: matK primers for ferns and allies*. (Royal Botanic Garden Edinburgh, Edinburgh, U.K., 2012).
- 18 Sang T, Crawford DJ, & Stuessy TF. Chloroplast DNA phylogeny, reticulate evolution, and biogeography of *Paeonia* (Paeoniaceae). *Am. J. Bot.* 1997;84: 1120-1136.

- 19 Tate JA, & Simpson BB. Paraphyly of Tarasa (Malvaceae) and diverse origins of the polyploid species. *Syst. Bot.* 2003;28: 723-737.
- 20 Hamilton M. Four primer pairs for the amplification of chloroplast intergenic regions with intraspecific variation. *Mol. Ecol.* 1999;8: 521-523.
- 21 Li X, Yang Y, Henry RJ, Rossetto M, Wang Y, Chen S. Plant DNA barcoding: from gene to genome. *Biol. Rev.* 2015;90: 157-166.
