# Supplementary material for: Assessment of BOLD and GenBank – Their accuracy and reliability for the identification of biological materials
Source: PubMed Central journal article supplement (PMC6584008; doi:10.1371/journal.pone.0217084), 2019-06-19
Supplement: pone.0217084.s004.pdf [file pone.0217084.s004.pdf]

S3 Table: Specimen information and barcode results for macro-fungi.

| Family           | Genus             | Species            | Year | ITS1              |              |                   |      |         | ITS2              |              |                   |      |         | ITS1 & ITS2  |      |         |
|------------------|-------------------|--------------------|------|-------------------|--------------|-------------------|------|---------|-------------------|--------------|-------------------|------|---------|--------------|------|---------|
|                  |                   |                    |      | Sequencing Primer | Query Length | GenBank Accession | BOLD | GenBank | Sequencing Primer | Query Length | GenBank Accession | BOLD | GenBank | Query Length | BOLD | GenBank |
| Amanitaceae      | <i>Amanita</i>    | <i>bisporigera</i> | 1973 | ITS5/ITS2         | 235          | MK895671          | ✓    | ✓       | ITS3/ITS4         | 149          | MK895685          | ✓    | ✓       | 384          | ✓    | ✓       |
|                  |                   | <i>gemmata</i>     | 1967 | ITS2              | 124          | MK895672          | ✓    | ✓✓+     | ITS4              | 340          | MK895686          | ✓    | ✓✓      | 464          | ✓    | ✓✓      |
|                  |                   | <i>ocreata</i>     | 1982 | N/A               | N/A          | N/A               | N/A  | N/A     | ITS4              | 337          | MK900748          | ✓✓   | ✓✓      | N/A          | N/A  | N/A     |
|                  |                   | <i>pantherina</i>  | 1973 | ITS5/ITS2         | 241          | MK895673          | ✓✓   | ✓✓+     | ITS4              | 241          | MK895687          | ✓✓   | ✓✓+     | 482          | ✓✓   | ✓✓+     |
|                  |                   | <i>phalloides</i>  | 1975 | ITS5/ITS2         | 237          | MK895674          | ✓✓   | ✓✓+     | ITS4              | 347          | MK895688          | ✓✓+  | ✓✓+     | 584          | ✓✓   | ✓✓+     |
|                  |                   | <i>verna</i>       | 1969 | ITS5/ITS2         | 219          | MK895675          | ✓    | ✓       | ITS4              | 321          | MK895689          | ✓    | ✓       | 540          | ✓    | ✓       |
|                  |                   | <i>virosa</i>      | 1979 | ITS2              | 112          | MK895676          | ✓    | ✓✓+     | ITS4              | 286          | MK895690          | ✓    | ✓       | 398          | ✓    | ✓       |
| Bolbitiaceae     | <i>Conocybe</i>   | <i>filaris</i>     | 1973 | ITS5/ITS2         | 283          | MK900745          | ✓✓   | ✓       | N/A               | N/A          | N/A               | N/A  | N/A     | N/A          | N/A  |         |
|                  | <i>Panaeolina</i> | <i>foeniseccii</i> | 1981 | ITS5/ITS2         | 236          | MK895682          | ✓✓   | ✓✓+     | ITS3              | 235          | MK895696          | ✓✓   | ✓       | 471          | ✓✓   | ✓       |
| Clavicipitaceae  | <i>Claviceps</i>  | <i>purpurea</i>    | 1945 | ITS5/ITS2         | 189          | MK895677          | ✓✓   | ✓✓      | ITS3/ITS4         | 290          | MK895691          | ✓✓   | ✓✓      | 479          | ✓✓   | ✓✓      |
| Discinaceae      | <i>Gyromitra</i>  | <i>esculenta</i>   | 1963 | ITS5/ITS2         | 429          | MK895679          | ✓    | ✓✓      | ITS3/ITS4         | 318          | MK895693          | ✓    | ✓✓      | 747          | ✓    | ✓✓      |
| Hymenogastraceae | <i>Psilocybe</i>  | <i>mexicana</i>    | 1958 | ITS5/ITS2         | 242          | MK895684          | ✓✓   | ✓✓      | ITS4              | 319          | MK895698          | ✓✓   | ✓✓      | 561          | ✓✓   | ✓✓      |
| Inocybaceae      | <i>Inocybe</i>    | <i>rimosa</i>      | 1949 | ITS5/ITS2         | 274          | MK895680          | ✓✓   | ✓       | ITS3/ITS4         | 324          | MK895694          | ✓✓   | ✓       | 598          | ✓✓   | ✓       |
|                  |                   | <i>geophylla</i>   | 1982 | ITS5/ITS2         | 306          | MK895681          | ✓✓+  | ✓✓+     | ITS3/ITS4         | 318          | MK895695          | ✓✓   | ✓✓+     | 624          | ✓✓   | ✓✓+     |
| Strophariceae    | <i>Stropharia</i> | <i>cubensis</i>    | 1977 | ITS5/ITS2         | 266          | MK895683          | ✓✓+  | ✓✓+     | ITS3/ITS4         | 333          | MK895697          | ✓✓   | ✓✓      | 599          | ✓✓   | ✓✓      |
| Tricholomataceae | <i>Clitocybe</i>  | <i>rivulosa</i>    | 1963 | ITS5/ITS2         | 261          | MK895678          | ✓    | ✓       | ITS3/ITS4         | 308          | MK895692          | ✓    | ✓       | 569          | ✓    | ✓       |

N/A=specimen did not amplify with any primer pair or had low quality sequence data, thus no downstream analyses were possible; ✓= accurate genus level identification; ✓✓= unambiguous genus and species level identification; ✓✓+= ambiguous species level identification (*i.e.*, where records with the same top statistic match represent more than one species).
